# Supplementary material for: Isolation of potassium salt of oxadiazole-2-thione and in vitro anticancer activities of its Cu(ii) and Zn(ii) complexes against MDA-MB-231 human breast carcinoma cells
Source: Royal Society of Chemistry journal article supplement (doi:10.1039/d3dt01388j), 2023-01-01
Supplement: d3dt01388j1.pdf [file d3dt01388j1.pdf]

Electronic Supplementary Material (ESI) for *Dalton Trans.*  
This journal is © The Royal Society of Chemistry 2023

**Isolation of potassium salt of oxadiazole-2-thione and *In Vitro*  
Anticancer Activities of its Cu(II) and Zn(II) complexes against MDA-  
MB-231 human breast carcinoma cells**

M.K. Gond<sup>a</sup>, Nilesh Rai<sup>b</sup>, Brijesh Chandra, Vibhav Gautam<sup>b</sup>, Somenath Garai<sup>a</sup>, R.J. Butcher<sup>c</sup>, M. K. Bharty<sup>a,\*</sup>

<sup>a</sup> Department of Chemistry, Banaras Hindu University, Varanasi-221005, India.

E-Mail: [manoj\\_vns2005@yahoo.co.in](mailto:manoj_vns2005@yahoo.co.in); [mkbharty@bhu.ac.in](mailto:mkbharty@bhu.ac.in)

<sup>b</sup> Centre of Experimental Medicine and Surgery, Institute of Medical Sciences, Banaras Hindu University, Varanasi 221005, India.

<sup>c</sup> Department of Chemistry, Howard University, 525 College Street NW, Washington, DC 20059, USA

## Contents

|                                       |    |
|---------------------------------------|----|
| 1. Materials and methods.....         | 3  |
| 2. IR spectra Figures.....            | 6  |
| 3. NMR spectra Figures.....           | 7  |
| 4. Electronic spectrum figure.....    | 8  |
| 5. Crystallographic Appendix.....     | 8  |
| 6. H-Bonding interaction figures..... | 13 |
| 7. References.....                    | 14 |

## 1. Materials and methods

Commercial reagents were used without further purification and all experiments, if otherwise mentioned, were carried out in an open atmosphere. Isonicotinic acid hydrazide, CS<sub>2</sub> and KOH were used as received. All the solvents were purchased from Merck Chemicals, India, and used after purification. The carbon, hydrogen, and nitrogen contents were estimated on a Carlo Erba 1108 model micro analyzer. Electronic spectra were recorded on a SHIMADZU 1700 UV-Visible spectrophotometer. Infrared spectra were recorded in the 4000-400 cm<sup>-1</sup> region as KBr pellets on a PerkinElmer Spectrum Version 10.4.3 3100 FT-IR spectrophotometers. <sup>1</sup>H and <sup>13</sup>C NMR spectra were recorded in DMSO-*d*<sub>6</sub> on a JEOL AL 300 FT-NMR spectrometer using TMS as an internal reference.

### 1.1 DNA protective assay

To determine the *in vitro* antioxidant activity of the Kpot·H<sub>2</sub>O and its complexes **1** and **2** against Fenton's reagent mediated hydroxyl radicals, DNA damage protective assay was performed [1]. In this assay, pBR322 plasmid DNA (0.5 μg) was mixed with Fenton's reagent (80 mM FeCl<sub>3</sub>, 30 mM H<sub>2</sub>O<sub>2</sub> and 50 mM ascorbic acid) and different concentrations of the ligand and metal complexes (5 μM and 10 μM) in a ratio of 1:1 (v/v). The volume (20 μL) of the reaction mixture was maintained by Milli-Q water and incubated for 15 minutes at 37 °C. The reaction mixture containing DNA of pBR322 plasmid and Fenton's reagent was taken as the positive control whereas, only DNA of pBR322 plasmid was as the negative control. Post-incubation, the 10 μL of the reaction mixture was subjected to gel electrophoresis onto 1% agarose, and the gel image was taken using a Gel Doc EZ imager (Bio-Rad, USA).

### 1.2 Cell culture maintenance and evaluation of *in vitro* cytotoxicity

The MDA-MB-231 cells (human breast cancer cell line) was cultured in Dulbecco's Modified Eagle Medium (DMEM), containing fetal bovine serum (10%) and streptomycin/penicillin solution (1%) [2]. The cell culture was maintained in a CO<sub>2</sub>-incubator at 37 °C with 5% CO<sub>2</sub> and humidity. Routine observations were made to assess the proliferation of adherent cells forming a monolayer with 80-90% confluence, while ensuring that there was no contamination. The cytotoxic potential of Kpot·H<sub>2</sub>O and its complexes **1** and **2** against MDA-MB-231 cells were evaluated using the 3-(4,5-dimethylthiazol-2-yl)-2,5-diphenyl-2H-tetrazolium bromide (MTT) assay with minor modifications, as previously described [3]. This assay is a crucial step performed on any chemical entity to determine its potential as a drug. In a 96-well plate, a total of 5 x 10<sup>3</sup> MDA-MB-231 cells were seeded and

treated for 24 hours with varying concentrations (5, 25, 50, 75, 100, and 200  $\mu\text{g/mL}$ ) of  $\text{Kpot}\cdot\text{H}_2\text{O}$  and its complexes **1** and **2**, and tamoxifen (positive control). Thereafter, the media was removed and 150  $\mu\text{L}$  of MTT (SRL) (0.5  $\text{mg/mL}$ ) was supplemented to each well, followed by a further 4-hours of incubation before being centrifuged for 20 minutes at 3000 rpm. The media containing MTT was then gently taken out, and 100% DMSO (100  $\mu\text{L}$ ) was to employed to dissolve the resulting crystals of formazan, and thereafter the absorbance was taken at 570 nm using a microplate reader (Thermo Scientific, USA). The following formula was used to determine the % cell viability:

Cell viability %:  $[(\text{Abs}_{(570\text{nm})}$  of the treated sample /  $\text{Abs}_{(570\text{nm})}$  of the control)] x 100.

### 1.3 Analysis of nuclear morphology

In order to assess the effect of  $\text{Kpot}\cdot\text{H}_2\text{O}$  and its complexes **1** and **2** on the cellular integrity and nuclear morphology of MDA-MB-231, 4',6-diaminodino-2-phenylindole (DAPI) fluorescent dye was employed [4]. A total of  $1 \times 10^5$  MDA-MB-231 cells were seeded onto sterile cover slip placed in a 6-well plate and exposed to the  $\text{IC}_{50}$  concentrations of  $\text{Kpot}\cdot\text{H}_2\text{O}$  and complexes **1** and **2**. Following the treatment for 24 hours, the cells were gently washed with sterile 1X phosphate buffer saline (PBS) and incubated with 70% methanol for 20 minutes at  $-20^\circ\text{C}$ . Subsequently, the cells were stained at room temperature with DAPI (Puregene, Genetix) for 15 minutes, and images of the DAPI stained cells were taken through fluorescence microscope (Leica, Germany).

### 1.4 Wound healing assay

To investigate the effect of  $\text{Kpot}\cdot\text{H}_2\text{O}$  and its complexes **1** and **2** on the gap-filling ability of MDA-MB-231 cells, wound healing assay was performed [5]. A total of  $2 \times 10^5$  MDA-MB-231 cells were seeded in 6-well plate and allowed to form a uniform monolayer after 24 hours. Subsequently, a constant gap was created by scraping the monolayer using a 20-200  $\mu\text{L}$  pipette tip, followed by gentle rinsing with 1X sterile PBS. Thereafter, cells were treated with  $\text{Kpot}\cdot\text{H}_2\text{O}$  and its complexes **1** and **2** for 24 hours, and images were obtained using an inverted microscope (ZEISS Axio Vert A1) at 0 and 24 hours. Using the image analysis software Image J, the length of the cell-free zone was measured, and presented using the equation shown below:

$$\% R = \left[ 1 - \left( \frac{\text{wound length at } T_{24\text{h}}}{\text{wound length at } T_{0\text{h}}} \right) \right] \times 100$$

Where, % R denotes the percentage of recovery, while  $T_{0h}$  and  $T_{24h}$  respectively refer to the wound length at 0 hours and 24 hours.

### 1.5 Caspase-3 activity

To evaluate the activity of Caspase-3 in MDA-MB-231, the Caspase-3 Activity Assay Kit (E-CK-A311A) was used in accordance with the manufacturer's instructions. In brief,  $2 \times 10^5$  MDA-MB-231 cells were treated with  $IC_{50}$  values of  $K_{pot} \cdot H_2O$  and its complexes **1** and **2** for 24 hours when they reached 70-80% confluency. Subsequently, cells were lysed using 2 mM DTT containing lysis buffer, followed by centrifugation to collect the protein-containing supernatant. The supernatant was incubated with the substrate for Caspase-3, Ac-DEVDpNA, in the reaction buffer and incubated for 4 hours at 37 °C, after which the level of Caspase-3-mediated release of pNA was quantified at 405 nm wavelength by microplate spectrophotometer (Thermo Scientific) [6].

### 1.6 Statistical analysis

Each experiment was carried out three times independently, and the results were reported as mean  $\pm$  S.D. To compare between the groups, one-way ANOVA followed by Tukey's test was conducted. Statistical significance was determined using a p-value \*\*\*,  $p \leq 0.001$ ; \*\*,  $p \leq 0.002$ ; \*,  $p \leq 0.033$ .

## 2. IR spectrum Figures

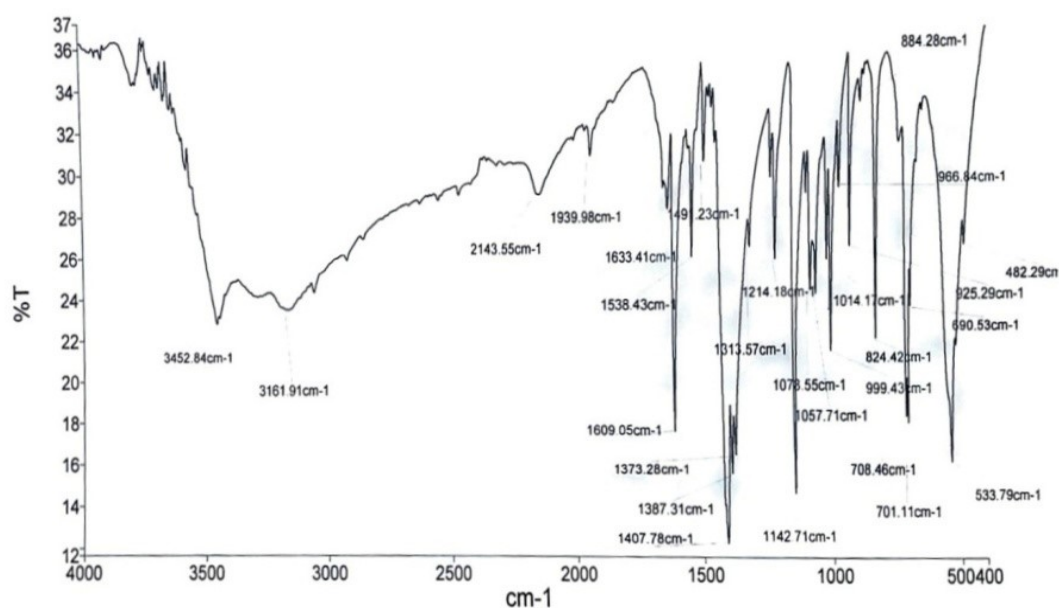

Supplementary Fig. 1. IR spectrum of  $K_{pot} \cdot H_2O$

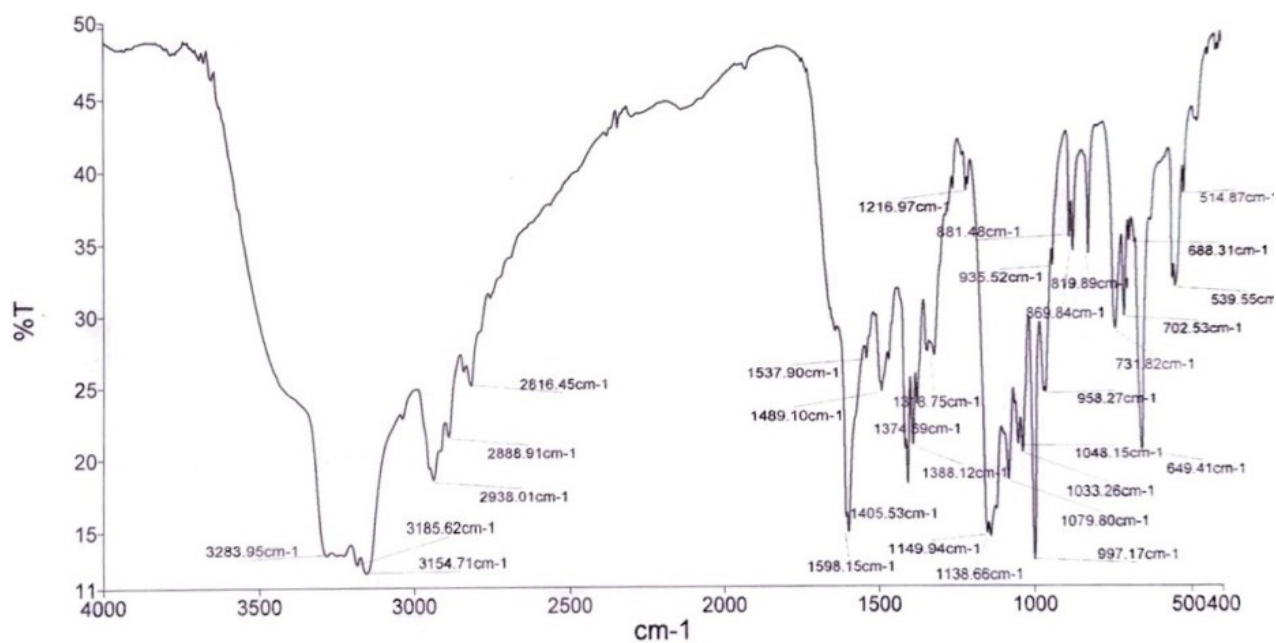

Supplementary Fig. 2. IR spectrum of  $[\text{Cu}(\text{en})_2](\text{pot})_2$  (1)

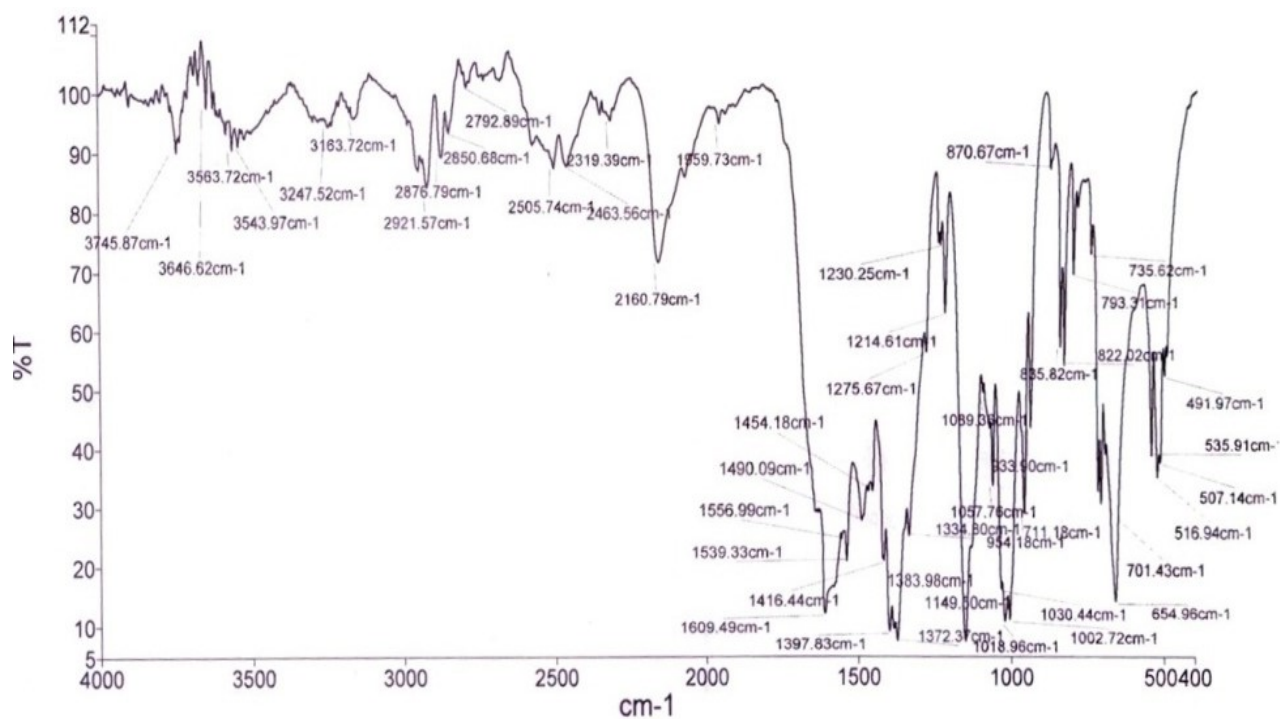

Supplementary Fig. 3. IR spectrum of  $[\text{Zn}(\text{en})_2](\text{pot})_2\text{HBr}\cdot\text{CH}_3\text{OH}$  (2)

### 3. NMR spectrum Figures

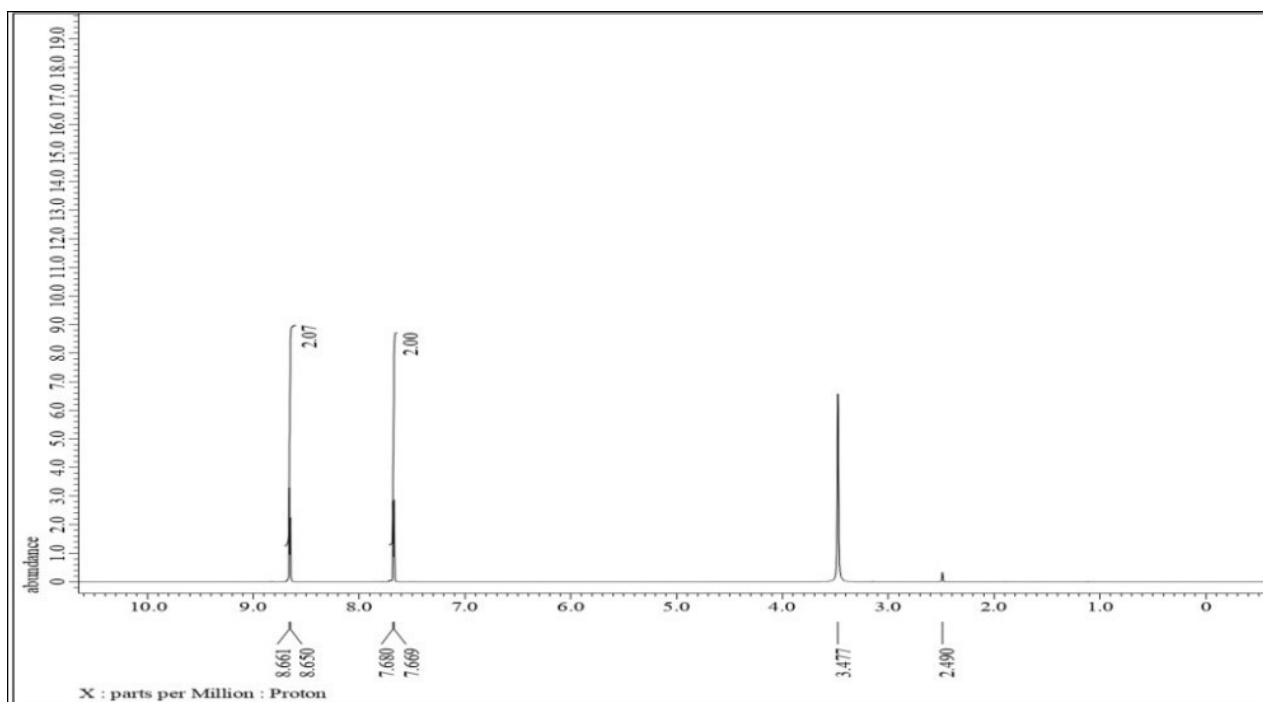

Supplementary Fig. 4. <sup>1</sup>H NMR spectrum of Kpot·H<sub>2</sub>O

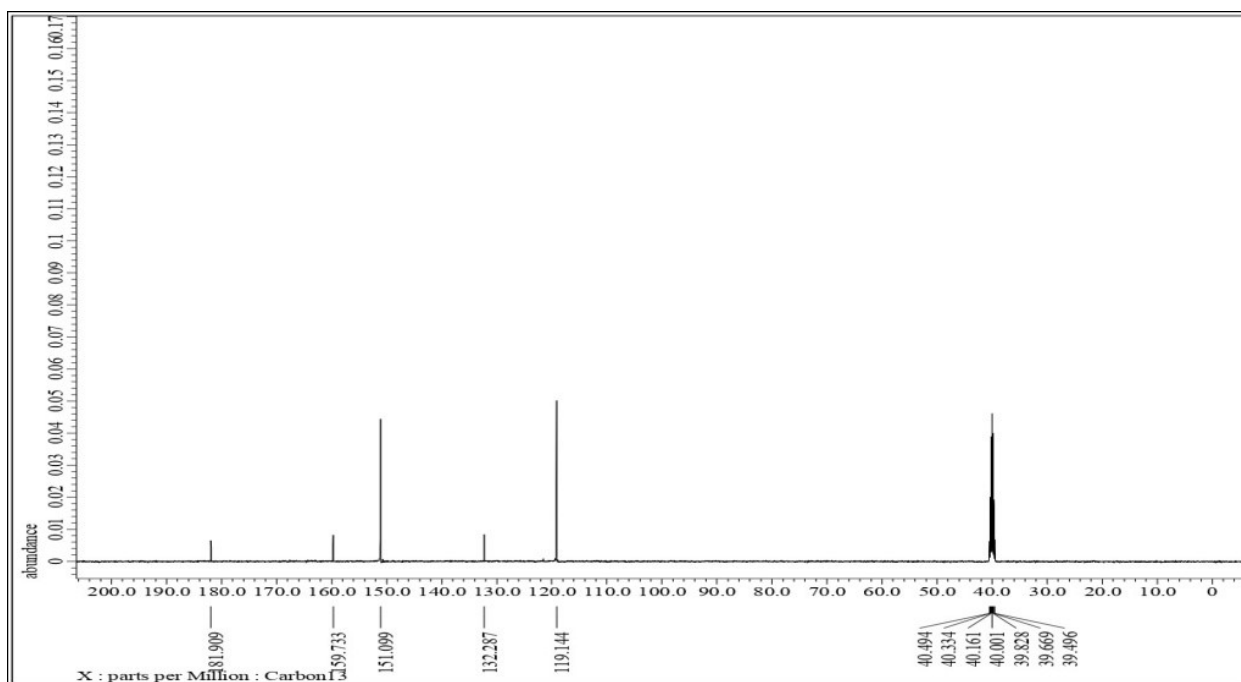

Supplementary Fig. 5. <sup>13</sup>C NMR spectrum of Kpot·H<sub>2</sub>O

#### 4. Electronic spectrum figure

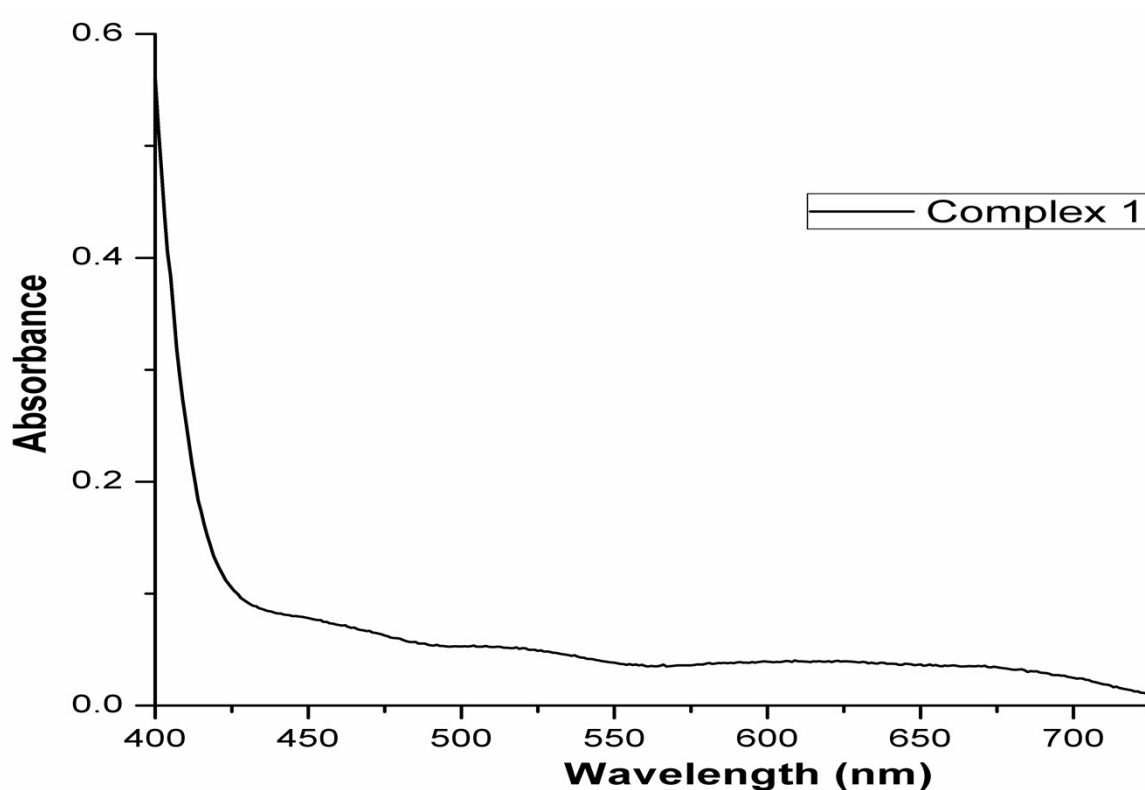

Supplementary Fig. 6. d-d Transition spectra of complexes **1** at  $10^{-3}$  M in MeOH

#### 5. Crystallographic Appendix

##### 5.1 X-ray crystallography

X-Ray diffraction measurements of  $K\text{pot}\cdot\text{H}_2\text{O}$  and complex **1** were performed using Oxford Gemini and Bruker three-circle diffractometer equipped with a CrysAlisPro/CrysAlis CCD software using a graphite mono-chromated  $\text{Mo K}\alpha$  ( $\lambda = 0.71073 \text{ \AA}$ ) radiation source at 296 K. The details of the temperature and monochromator of diffractometers are mentioned in the crystallographic data tables. Multi-scan absorption correction was applied to the X-ray data collection for all the compounds. The structures were solved by direct methods (SHELXS-08) and refined against all data by full matrix least-square on  $F^2$  using anisotropic displacement parameters for all non-hydrogen atoms. All hydrogen atoms were included in the refinement at geometrically ideal position and refined with a riding model [7]. The MERCURY package and ORTEP-3 for Windows program were used for generating structures [8, 9]. Single crystals of complex **2** was kept at 100.00 K during data collection. The material was recrystallised from methanol by slow evaporation. A suitable crystal was selected and the crystal was



mounted on a glass fibre oil on a Bruker APEX-II CCD diffractometer. Using Olex2 [10] package, the structure was solved with the SHELXT [11] structure solution program using Intrinsic Phasing and refined with the olex2.refine [12] refinement package using Levenberg-Marquardt minimisation and we have anisotropically refined the hydrogen atoms attached with the complex using NoSpherA2 [12] implemented in OLEX 2.

**Supplementary Table 1.** Crystallographic data for Kpot·H<sub>2</sub>O, complexes **1** and **2**

| Parameters                                                             | Kpot·H <sub>2</sub> O                                          | <b>1</b>                                                                        | <b>2</b>                                                                           |
|------------------------------------------------------------------------|----------------------------------------------------------------|---------------------------------------------------------------------------------|------------------------------------------------------------------------------------|
| Empirical formula                                                      | C <sub>7</sub> H <sub>6</sub> KN <sub>3</sub> O <sub>2</sub> S | C <sub>18</sub> H <sub>24</sub> CuN <sub>10</sub> O <sub>2</sub> S <sub>2</sub> | C <sub>19</sub> H <sub>29</sub> BrN <sub>10</sub> O <sub>3</sub> S <sub>2</sub> Zn |
| Formula weight                                                         | 235.31                                                         | 540.13                                                                          | 654.94                                                                             |
| Crystal system                                                         | Triclinic                                                      | Monoclinic                                                                      | triclinic                                                                          |
| Space group                                                            | P 1                                                            | P 21/n                                                                          | P -1                                                                               |
| T (K)                                                                  | 100(2)                                                         | 566(2)                                                                          | 100(2)                                                                             |
| λ, Mo Kα (Å)                                                           | 0.71073                                                        | 0.71073                                                                         | 0.71073                                                                            |
| a (Å)                                                                  | 4.2204(14)                                                     | 10.9088(14)                                                                     | 8.1195(4)                                                                          |
| b (Å)                                                                  | 6.0284(19)                                                     | 10.2087(9)                                                                      | 8.5613(4)                                                                          |
| c (Å)                                                                  | 9.659(3)                                                       | 11.9734(14)                                                                     | 9.9222(4)                                                                          |
| α (°)                                                                  | 84.14(3)                                                       | 90                                                                              | 97.183(2)                                                                          |
| β (°)                                                                  | 80.32(3)                                                       | 114.208(5)                                                                      | 109.571(2)                                                                         |
| γ (°)                                                                  | 78.44(3)                                                       | 90                                                                              | 99.479(2)                                                                          |
| V, (Å <sup>3</sup> )                                                   | 236.73(14)                                                     | 1216.2(2)                                                                       | 628.84(5)                                                                          |
| Z                                                                      | 1                                                              | 2                                                                               | 1                                                                                  |
| ρ <sub>calcd</sub> (g/cm <sup>3</sup> )                                | 1.651                                                          | 1.475                                                                           | 1.729                                                                              |
| μ (mm <sup>-1</sup> )                                                  | 0.756                                                          | 1.106                                                                           | 2.776                                                                              |
| F(000)                                                                 | 120                                                            | 558                                                                             | 334                                                                                |
| Crystal size (mm)                                                      | 0.19 x 0.16 x 0.12                                             | 0.19 x 0.15 x 0.17                                                              | 0.24 x 0.17 x 0.11                                                                 |
| θ range for data collections(°)                                        | 3.458 to 28.987                                                | 3.287 to 25.347                                                                 | 2.221 to 26.372                                                                    |
| Index ranges                                                           | -5<=h<=5,<br>-7<=k<=7,<br>-12<=l<=12                           | -13<=h<=13,<br>-12<=k<=12,<br>-14<=l<=14                                        | -10<=h<=10,<br>-10<=k<=10,<br>-10<=l<=12                                           |
| No. of reflections collected                                           | 1676                                                           | 10634                                                                           | 6871                                                                               |
| No. of independent reflections(R <sub>int</sub> )                      | 1389                                                           | 2208                                                                            | 2554                                                                               |
| No. of data/restrains/parameters                                       | 1389 / 3 / 135                                                 | 2208 / 0 / 151                                                                  | 2554/ 12/177                                                                       |
| Goodness-of-fit on F <sup>2</sup>                                      | 1.065                                                          | 1.075                                                                           | 1.066                                                                              |
| R <sub>1</sub> <sup>a</sup> , wR <sub>2</sub> <sup>b</sup> [(I>2σ(I))] | 0.0283, 0.0726                                                 | 0.0391, 0.1098                                                                  | 0.0340, 0.0843                                                                     |

|                                                                   |                  |                  |                  |
|-------------------------------------------------------------------|------------------|------------------|------------------|
|                                                                   |                  |                  |                  |
| $R_1^a$ , $wR_2^b$ (all data)                                     | 0.0300, 0.0759   | 0.0429, 0.1170   | 0.0393, 0.0880   |
| Largest difference in peak /hole<br>( $e \cdot \text{\AA}^{-3}$ ) | 0.223 and -0.278 | 0.613 and -0.393 | 0.726 and -0.882 |

$$^aR_1 = \frac{\sum ||F_o| - |Fc||}{\sum |F_o|}, \quad ^bR_2 = \left[ \frac{\sum w (|F_o|^2 - |F_c|^2)^2}{\sum w |F_o|^2} \right]^{1/2}$$

### Supplementary Table 2 Bond length (Å) and angles (°) for Kpot·H<sub>2</sub>O

| Bond length (Å) |            | Bond angle (°)   |            |
|-----------------|------------|------------------|------------|
| K-S(1)#3        | 3.3303(16) | S(1)-K-K#1       | 74.25(3)   |
| K-S(1)          | 3.4542(16) | S(1)#4-K-S(1)#3  | 78.01(4)   |
| K-S(1)#4        | 3.3752(15) | O(1)#4-K-K(2)#2  | 79.00(5)   |
| K-O(1)#3        | 3.037(3)   | O(1)#4-K-S(1)#3  | 66.24(6)   |
| K-O(1W)         | 2.691(4)   | O(1W)-K-S(1)     | 80.01(10)  |
| K-O(1W)#1       | 3.186(5)   | O(1W)#1-K-S(1)#3 | 70.57(8)   |
| K-N(1)          | 2.939(3)   | O(1W)-K-N(1)#2   | 72.6(11)   |
| K-N(1)#2        | 3.005(4)   | N(1)-K-K#1       | 45.39(7)   |
| S(1)-C(1)       | 1.702(4)   | N(1)-K-S(1)#3    | 89.33(7)   |
| O(1)-C(1)       | 1.383(4)   | N(1)-K-S(1)      | 49.55(7)   |
| O(1)-C(2)       | 1.357(4)   | N(1)#2-K-O(1)#4  | 86.28(8)   |
| N(1)-N(2)       | 1.404(4)   | N(1)-K-N(1)#2    | 90.47(10)  |
| N(1)-C(1)       | 1.304(5)   | C(1)-S(1)-K      | 76.19(12)  |
| N(2)-C(2)       | 1.291(5)   | C(1)-O(1)-K#5    | 99.78(18)  |
| N(3)-C(5)       | 1.340(6)   | N(2)-N(1)-K#1    | 90.2(2)    |
| N(3)-C(6)       | 1.319(6)   | C(1)-S(1)-K#6    | 121.81(13) |

Symmetry transformations used to generate equivalent atoms:

<sup>1</sup>-1+X,+Y,+Z; <sup>2</sup>1+X,+Y,+Z; <sup>3</sup>+X,-1+Y,+Z; <sup>4</sup>1+X,-1+Y,+Z; <sup>5</sup>-1+X,1+Y,+Z; <sup>6</sup>+X,1+Y,+Z

**Supplementary Table 3.** Hydrogen bonds parameters for  $Kpot \cdot H_2O$ 

| D-H...A             | d(D-H)  | d(H...A) | d(D...A) | <(DHA) |
|---------------------|---------|----------|----------|--------|
| O(1W)-H(1WA)-N(3)#1 | 0.83(7) | 2.03(7)  | 2.855(5) | 174(6) |
| O(1W)-H(1WB)-S(1)#2 | 0.79(6) | 2.57(6)  | 3.308(4) | 155(5) |
| C(5)-H(5)-S(1)#3    | 0.95    | 2.93     | 3.745(4) | 144.4  |

Symmetry transformations used to generate equivalent atoms:  $^12+X,-1+Y,1+Z$ ;  $^21+X,+Y,+Z$ ;  $^3-1+X,+Y,-1+Z$

**Supplementary Table 4.** Bond length (Å) and angles (°) for  $[Cu(en)_2](pot)_2$  (1)

| Bond length (Å) |          | Bond angle (°)      |            |
|-----------------|----------|---------------------|------------|
| Cu(1)-N(4)#1    | 2.096(2) | N(4)#1-Cu(1)-N(3)   | 97.09(9)   |
| Cu(1)-N(4)      | 2.096(2) | N(4)-Cu(1)-N(3)     | 82.91(9)   |
| Cu(1)-N(3)      | 2.101(2) | N(4)#1-Cu(1)-N(1)   | 90.32(8)   |
| Cu(1)-N(3)#1    | 2.101(2) | N(4)-Cu(1)-N(1)     | 89.68(8)   |
| Cu(1)-N(1)      | 2.114(2) | N(3)-Cu(1)-N(1)     | 90.34(8)   |
| Cu(1)-N(1)#1    | 2.114(2) | N(3)#1-Cu(1)-N(1)   | 89.66(8)   |
| S(1)-C(1)       | 1.675(3) | N(4)#1-Cu(1)-N(1)#1 | 89.68(8)   |
| O(1)-C(2)       | 1.352(3) | N(4)-Cu(1)-N(1)#1   | 90.32(8)   |
| O(1)-C(1)       | 1.387(3) | N(3)#1-Cu(1)-N(1)#1 | 90.34(8)   |
| N(1)-C(1)       | 1.312(4) | C(2)-O(1)-C(1)      | 104.17(19) |
| N(1)-N(2)       | 1.402(3) | C(1)-N(1)-N(2)      | 108.6(2)   |
| N(3)-C(8)       | 1.467(4) | N(2)-C(2)-O(1)      | 113.4(2)   |
| N(2)-C(2)       | 1.276(3) | N(1)-C(1)-O(1)      | 108.4(2)   |

Symmetry transformations used to generate equivalent atoms: #1 -x+1,-y+1,-z

**Supplementary Table 5.** Hydrogen bonds parameters for [Cu(en)<sub>2</sub>](pot)<sub>2</sub> (1)

| D-H...A             | d(D-H) | d(H...A) | d(D...A) | <(DHA) |
|---------------------|--------|----------|----------|--------|
| N(3)-H(3A)...N(2)#1 | 0.89   | 2.62     | 3.194(3) | 122.9  |
| N(3)-H(3A)...N(5)#2 | 0.89   | 2.52     | 3.255(4) | 140.2  |
| N(3)-H(3B)...S(1)   | 0.89   | 2.66     | 3.415(2) | 143.8  |
| N(4)-H(4A)...N(2)   | 0.89   | 2.64     | 3.208(3) | 122.6  |
| N(4)-H(4B)...S(1)#1 | 0.89   | 2.76     | 3.505(2) | 141.8  |

Symmetry transformations used to generate equivalent atoms: #1 -x+1,-y+1,-z #2 x,y,z+1

**Supplementary Table 6.** Bond length (Å) and angles (°) for [Zn(en)<sub>2</sub>(pot)<sub>2</sub>HBr·CH<sub>3</sub>OH (2)

| Bond length (Å) |           | Bond angle (°) |            |
|-----------------|-----------|----------------|------------|
| Zn1-N2          | 1.938(2)  | N2-Zn1-N5      | 89.35(10)  |
| Zn1-N5          | 1.954(2)  | N2-Zn1-N4      | 89.68(10)  |
| Zn1-N4          | 1.958(2)  | N5-Zn1-N4      | 85.83(10)  |
| S1-C1           | 1.675(3)  | N5-Zn1-N4#1    | 94.17(10)  |
| O1-C2           | 1.358(3)  | C2-O1-C1       | 104.9(2)   |
| O1-C1           | 1.375(3)  | N1-N2-Zn1      | 117.83(17) |
| N2-N1           | 1.384(3)  | C1-N2-N1       | 109.3(2)   |
| N2-C1           | 1.331(3)  | C2-N1-N2       | 105.3(2)   |
| N1-C2           | 1.291(4)  | C9-N5-Zn1      | 109.38(18) |
| N4-C8           | 1.486(4)  | O1-C1-S1       | 121.2(19)  |
| C5-N3           | 1.322(5)  | N3-C6-C7       | 123.7(3)   |
| O2-C10          | 1.393(17) | N1-C2-O1       | 112.8(2)   |

Symmetry transformations used to generate equivalent atoms: #1 -x+1,-y+2,-z+1

**Supplementary Table 7.** Hydrogen bonds parameters for [Zn(en)<sub>2</sub>(pot)<sub>2</sub>HBr·CH<sub>3</sub>OH (2)**Supplementary Table 7.** Hydrogen bonds parameters for [Zn(en)<sub>2</sub>(Hpot)(pot)]Br·CH<sub>3</sub>OH (2)

| D-H...A               | d(D-H)  | d(H...A) | d(D...A) | <(DHA) |
|-----------------------|---------|----------|----------|--------|
| N(5)-H(5A)...S(1)     | 0.75(5) | 2.64(5)  | 3.305(4) | 148(4) |
| N(5)-H(5B)...Br(01)#2 | 0.72(5) | 2.76(5)  | 3.387(3) | 147(4) |
| N(5)-H(5B)...N(1)#1   | 0.72(5) | 2.53(4)  | 2.992(4) | 124(4) |

|                                                     |         |         |           |        |
|-----------------------------------------------------|---------|---------|-----------|--------|
| N(4)-H(4A)...S(1)#1                                 | 0.72(5) | 2.64(5) | 3.288(4)  | 151(4) |
| N(4)-H(4B)...N(1)                                   | 0.77(5) | 2.43(4) | 2.932(4)  | 124(4) |
| N(4)-H(4B)...N(3)#3                                 | 0.77(5) | 2.49(5) | 3.128(4)  | 142(4) |
| C(5)-H(5)...Br(01)#4                                | 0.85(7) | 3.10(6) | 3.685(5)  | 127(4) |
| C(6)-H(6)...S(1)#5                                  | 0.84(5) | 2.83(5) | 3.662(5)  | 174(4) |
| C(9)-H(9B)...Br(01)#2                               | 0.92(5) | 3.05(5) | 3.614(4)  | 121(3) |
| C(10 <sup>a</sup> )-H(10A <sup>a</sup> )...Br(01)#6 | 0.98    | 2.44    | 3.373(14) | 158.8  |
| C(10 <sup>a</sup> )-H(10B <sup>a</sup> )...S(1)#1   | 0.98    | 2.79    | 3.527(12) | 132.1  |

Symmetry transformations used to generate equivalent atoms:

#1 -x+1,-y+2,-z+1 #2 x,y,z+1 #3 -x,-y+1,-z #4 x,y-1,z #5 x-1,y,z-1 #6 x-1,y,z

## 5. H-Bonding interaction Figures

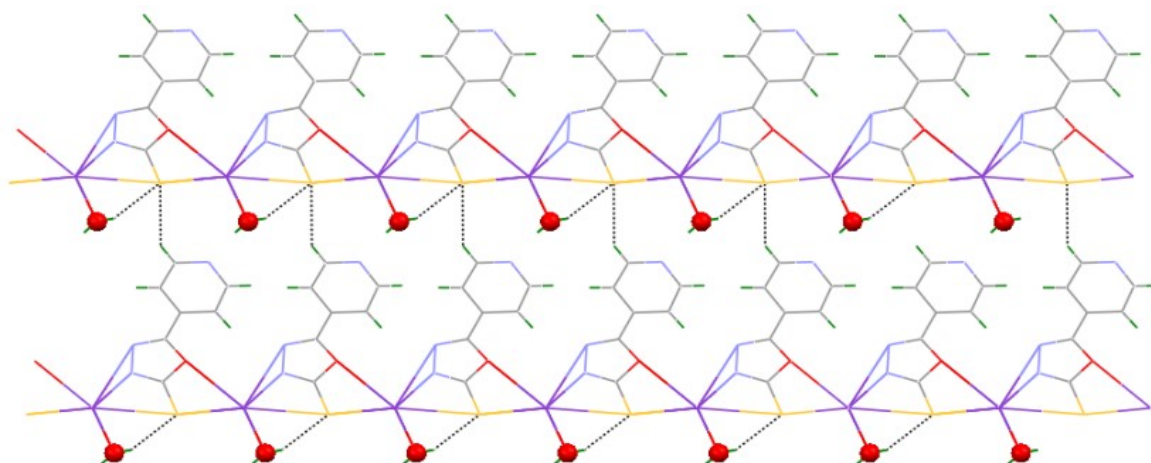

**Supplementary Fig. 9** Showing O-H...S, C-H...S hydrogen bonding interactions leading to supramolecular architectures in Kpot·H<sub>2</sub>O

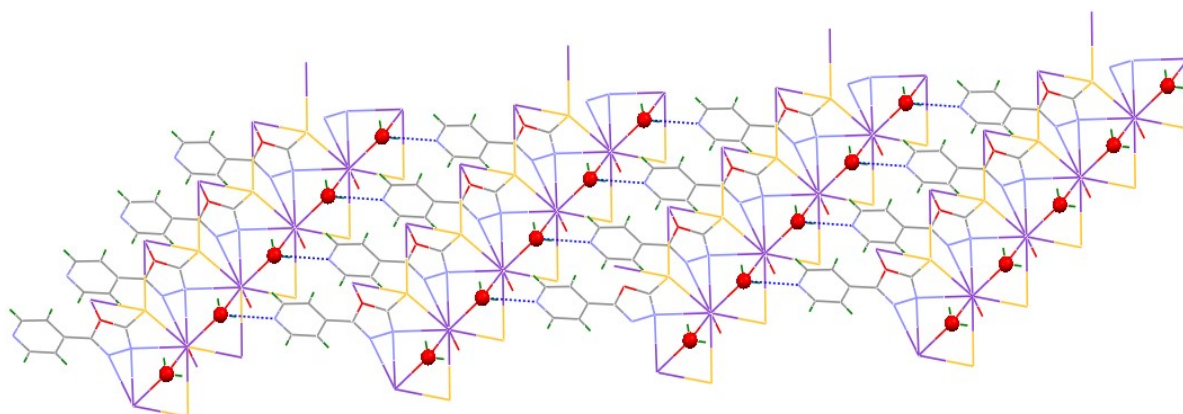

**Supplementary Fig. 10** O-H...N hydrogen bonding interactions leading to ladder like structures in Kpot·H<sub>2</sub>O

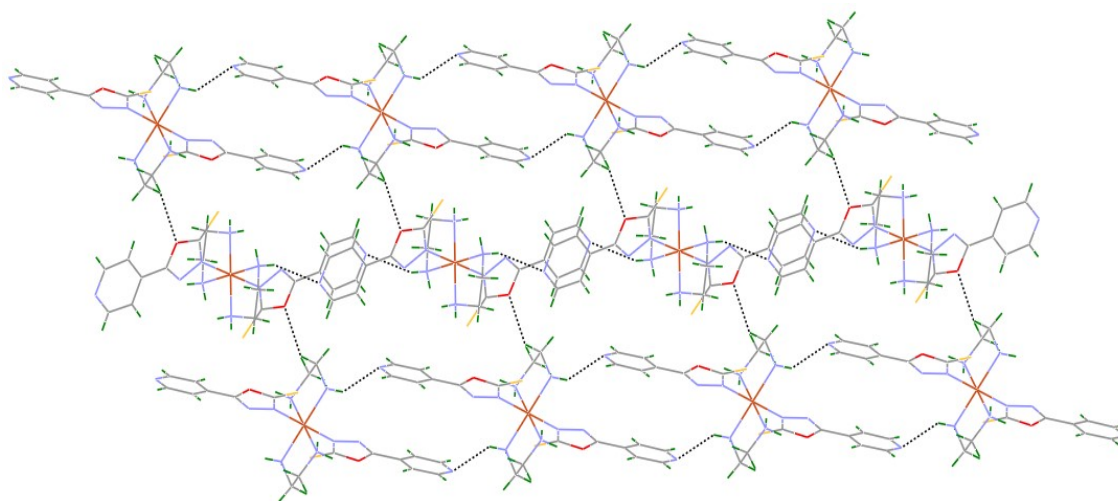

**Supplementary Fig. 11** N-H $\cdots$ O and C-H $\cdots$ O hydrogen bonding interactions leading to a supramolecular structure in [Cu(en) $_2$ ](pot) $_2$  (**1**)

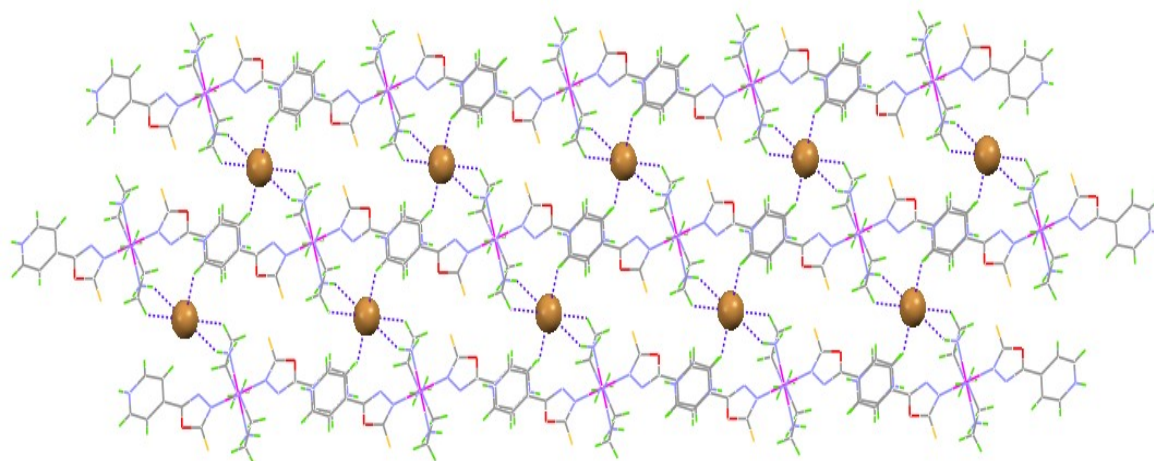

**Supplementary Fig. 12.** N-H $\cdots$ Br and C-H $\cdots$ Br hydrogen bonding interactions leading to a supramolecular structure in [Zn(en) $_2$ (pot) $_2$ HBr $\cdot$ CH $_3$ OH (**2**)

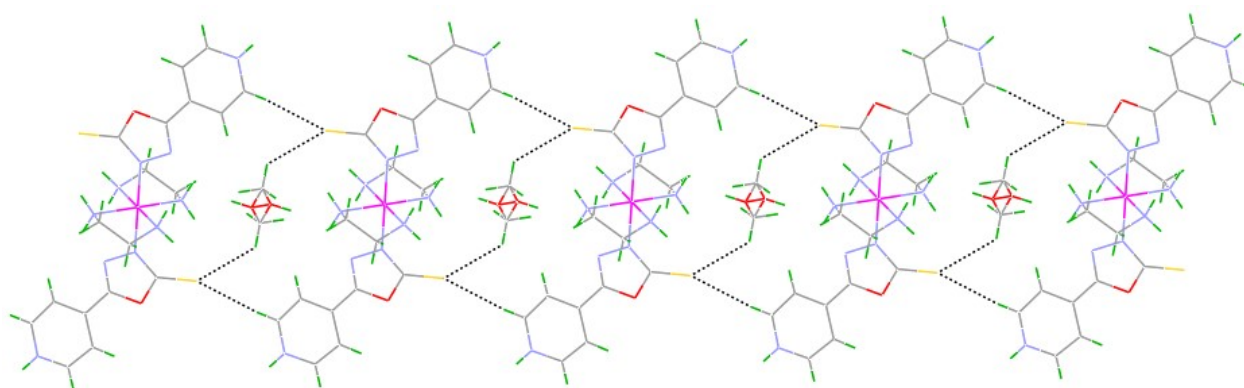

**Supplementary Fig. 13.** Showing C-H $\cdots$ S hydrogen bonding interactions leading to a linear structure in [Zn(en) $_2$ (pot) $_2$ HBr $\cdot$ CH $_3$ OH (**2**)

## Reference

- [1] N. Rai, P. Gupta, A. Verma, R.K. Tiwari, P. Madhukar, S. C. Kamble, A. Kumar, R. Kumar, S.K. Singh, V. Gautam, *ACS Omega* 2023, **8**, 3768–3784.
- [2] N. Rai, P.K. Keshri, P. Gupta, A. Verma, S.C. Kamble, S.K. Singh, V. Gautam, *Plos One*, 2022, **17**, p.e0264673.
- [3] A. Verma, P. Gupta, N. Rai, R.K. Tiwari, A. Kumar, P. Salvi, S.C. Kamble, S.K. Singh, V. Gautam, *J. Fungi* 2022, **8**, 285.
- [4] B.Y. Choi, H.Y. Kim, K.H. Lee, Y.H. Cho, G. Kong, *Cancer Lett.*, 1999, **147**, 85-93.
- [5] P. Gupta, N. Rai, A. Verma, D. Saikia, S.P. Singh, R. Kumar, S.K. Singh, D. Kumar, V. Gautam, *ACS Omega* 2022, **7**, 46653–46673.
- [6] N. Rai, P. Gupta, A. Verma, S.K. Singh, V. Gautam, *BioFactors*, 2023, 01-22.
- [7] G.M. Sheldrick, *Acta Crystallogr. Section A*, 2008, **64**, 112-122.
- [8] C.F. Macrae, I.J. Bruno, J.A. Chisholm, P.R. Edgington, P. McCabe, E. Pidcock, L. Rodriguez-Monge, R. Taylor, J. Van de Streek, P.A., Wood, *Appl. Cryst.*, 2008, **41**, 466-470.
- [9] L.J. Farrugia, *J. Appl. Cryst.*, 2012, **45**, 849-854.
- [10] O.V. Dolomanov, L.J. Bourhis, R.J. Gildea, J.A.K. Howard, H. Puschmann, *J. Appl. Cryst.* 2009, **42**, 339-341.
- [11] G.M. Sheldrick, *Acta Cryst.* 2015, **A71**, 3-8.
- [12] L.J. Bourhis, O.V. Dolomanov, R.J. Gildea, J.A.K. Howard, H. Puschmann, *Acta Cryst.* 2015, **A71**, 59-75.
